# Supplementary material
Source: PubMed Central journal article supplement (PMC3315183)
Supplement: NIHMS358068-supplement-1_si_001.pdf [file NIHMS358068-supplement-1_si_001.pdf]

## Supporting Information:

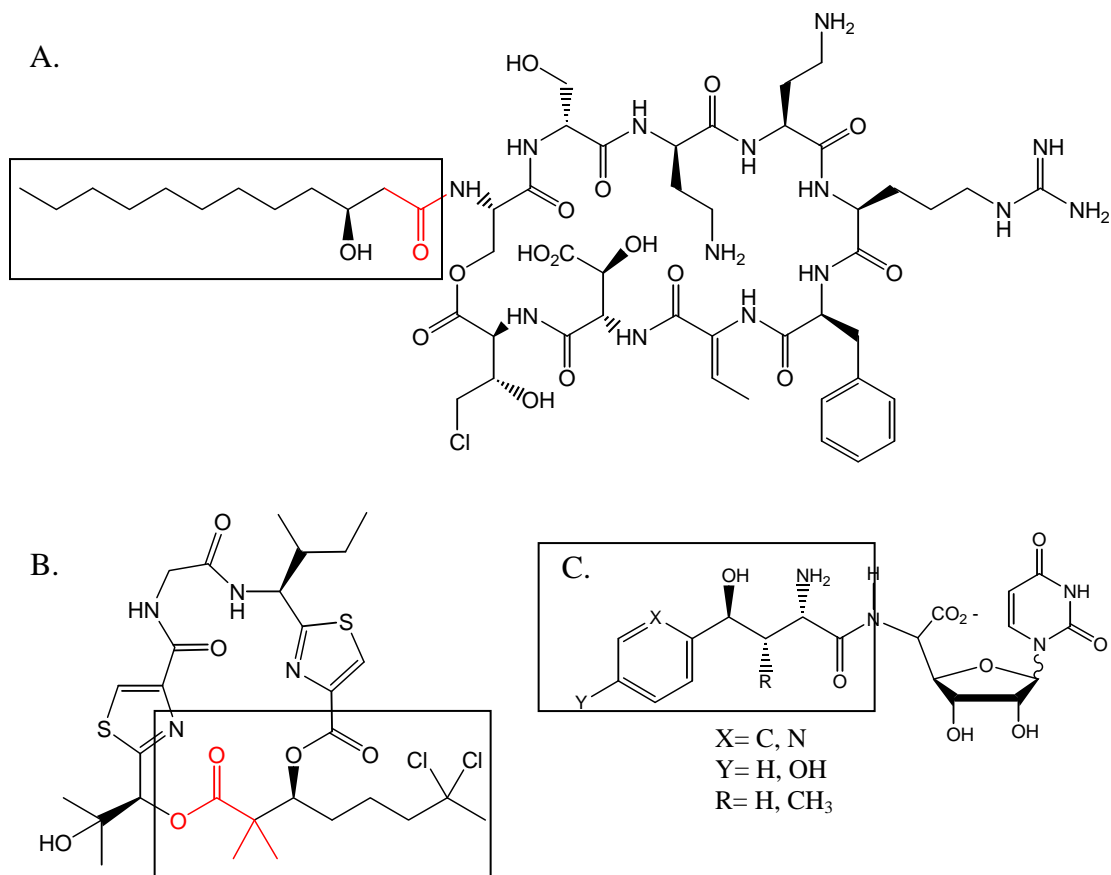

**Figure S1.** Pharmaceutical targets that could be partially synthesized by enzyme-catalyzed aldol condensations. The portions of each molecule that can be synthesized using a pyruvate aldolase followed by a minimal number of steps are shown with boxes. The pyruvate equivalences are highlighted in red: (A) the 3-hydroxy-lipoic amides of syringomycin E<sup>1</sup> and other lipodepsipeptide; (B) the dimethyl  $\beta$ -hydroxylactone of lyngbyabellin<sup>2</sup>; and (C) the 2-amino-(4-aryl)-4-hydroxybutyrate chain of nikkomycins.

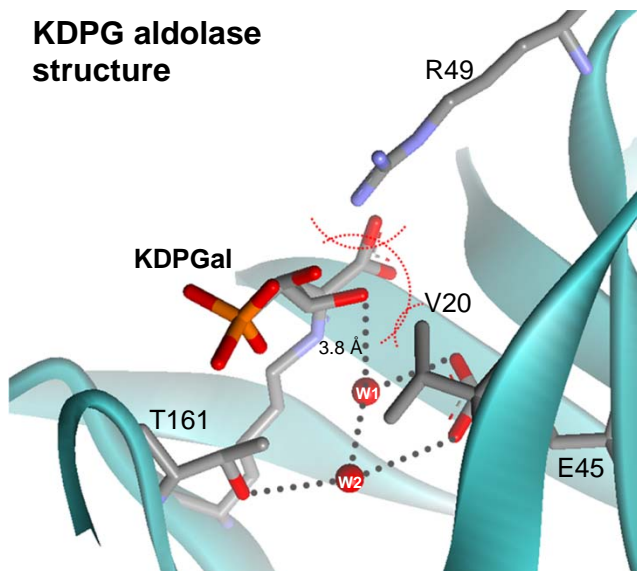

**Figure S2.** Model of KDPGal bound to *E. coli* KDPG aldolase. The *galacto*-configuration is disfavored because the C4 hydroxyl makes unfavorable van der Waals contacts with R49 and V20 (shown as dashed red lines). Furthermore, W1 is poorly situated to facilitate proton transfer (3.8 Å and a proton abstraction angle of 76°).

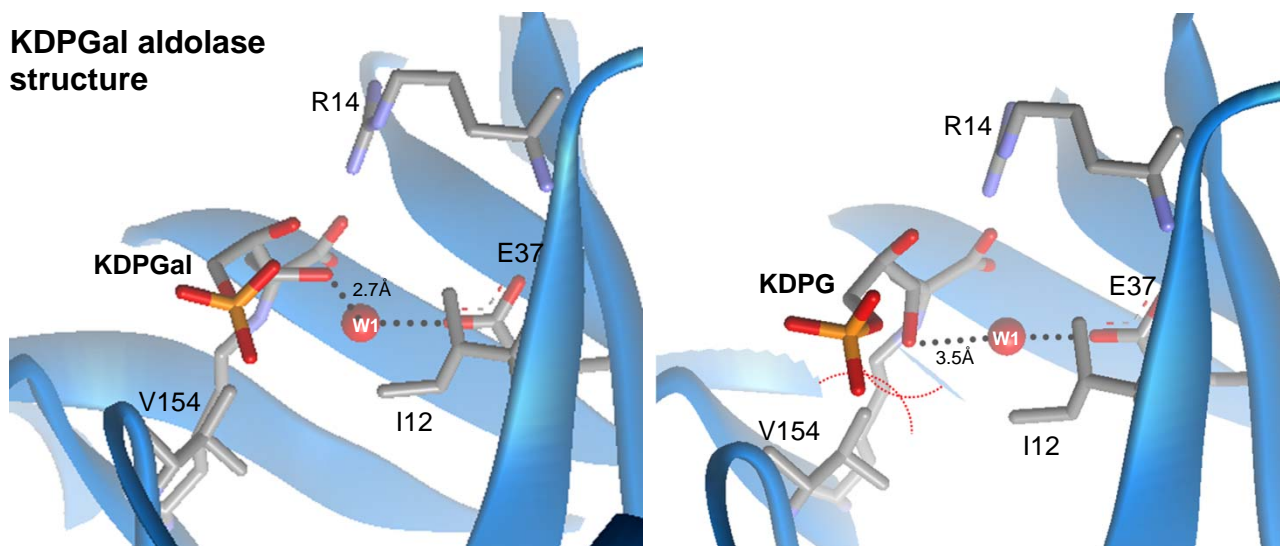

**Figure S3.** Stereoselectivity in *E. coli* KDPGal aldolase. (A) Structure of *galacto*-sugar bound to KDPGal aldolase.<sup>11</sup> Unlike KDPG aldolase, KDPGal aldolase does not have a W2 binding pocket. Consequently, W1 and Glu37 are positioned deeper in the active site and closer to R14. Only in the *galacto*-configuration where O4 points towards R14 can this oxygen reach W1 to accomplish proton transfer (distance 2.7 Å and proton abstraction angle of 114°). (B) Model of *gluco*-sugar bound to KDPGal aldolase. The *gluco*-configuration is disfavored because the distance and geometry of the O4 water W1 interaction are poor (3.5 Å and 80° angle of proton abstraction). Also the lower pocket occupied by the O4 of the *gluco*-sugar is destabilized by steric clashes with V154 (shown as dashed red lines) and the pocket is entirely hydrophobic.

**Table S1.** Some important aldolases for synthetic applications.

|   | Donor nucleophile                                                                                                                                                                                                            | Names of aldolases                                                             | Products                                                                                                                                                                                                                                                                                                                                             | References                                                                                                                                                                                                                      |
|---|------------------------------------------------------------------------------------------------------------------------------------------------------------------------------------------------------------------------------|--------------------------------------------------------------------------------|------------------------------------------------------------------------------------------------------------------------------------------------------------------------------------------------------------------------------------------------------------------------------------------------------------------------------------------------------|---------------------------------------------------------------------------------------------------------------------------------------------------------------------------------------------------------------------------------|
| 1 | Dihydroxyacetone phosphate/<br>Dihydroxyacetone<br><br>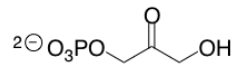                                                                                     | FBP<br>FSA <sup>a</sup><br><br>TBP<br><br>RhuA<br><br>FucA                     | <br><br><br> | Choi 2001 <sup>3</sup><br>Schurmann 2001 <sup>4</sup><br><br>Hall 2002 <sup>5</sup> &<br>Lowkam 2010 <sup>6</sup><br><br>Kroemer 2003 <sup>7</sup><br><br>Joerger 2000 <sup>8</sup>                                             |
| 2 | Pyruvate /<br>Phosphoenol-<br>pyruvate<br><br><br><br> | KDG<br><br>KDPG<br><br>KDPGal<br><br>NeuAc<br><br>BphI<br><br>HpaI<br><br>KDO8 | <br><br><br><b>(a)</b><br><br><b>(b)</b><br><br><b>(a)</b><br><br><b>(b)</b><br><br><b>(a)</b><br><br><b>(b)</b><br><br><b>(b)</b><br><br><b>(b)</b><br><br><b>(b)</b>           | Theodossis 2004 <sup>9</sup><br><br>Allard 2001 <sup>10</sup><br><br>Walters 2008 <sup>11</sup><br><br>Izard 1994 <sup>12</sup><br><br>Baker 2011 <sup>13</sup><br><br>Wang 2005 <sup>14</sup><br><br>Radaev 2000 <sup>15</sup> |
| 3 | Acetaldehyde<br><br>                                                                                                                      | DERA                                                                           |                                                                                                                                                                                                                                                                  | Hiene 2004 <sup>16</sup>                                                                                                                                                                                                        |

4 Glycine

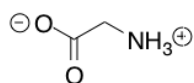

TA

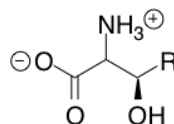

Kielkopf 2002<sup>17</sup>

<sup>a</sup> FSA uses dihydroxyacetone as its nucleophilic substrate.

FBP, fructose-1,6-bisphosphate aldolase; FSA, fructose-6-phosphate aldolase; TBP, tagatose-1,6-bisphosphate aldolase; RhuA, rhamnulose-1-phosphate aldolase; FucA, fuculose-1-phosphate aldolase; KDG, 2-keto-3-deoxygluconate aldolase; KDPG, 2-keto-3-deoxy-6-phosphogluconate aldolase; KDPGal, 2-keto-3-deoxy-phosphogalactonate aldolase; KDO8, 3-deoxy-D-manno-octulosonate 8-phosphate synthase; NeuAc, N-acetylneuraminic acid lyase or D-sialic acid aldolase; DERA, 2-deoxyribose-5-phosphate aldolase; TA, L-threonine acetaldehyde-lyase; BphI is a catabolic aldolase part of the polychlorinated biphenyls degradation pathway; HpaI is a catabolic aldolase in the hydroxyphenylacetate pathway

**Table S2**

|                                | T161 |      | G162 |      | S184 |      |
|--------------------------------|------|------|------|------|------|------|
|                                | KHO  | KHPB | KHO  | KHPB | KHO  | KHPB |
| Number of plasmids transformed | 160  | 120  | >200 | >200 | >200 | >200 |
| Number of colonies grown       | 2    | 3    | 3    | 0    | 3    | 0    |
| Number of unique sequences     | 2    | 1    | 2    | -    | 1    | -    |

## References:

1. Stock, S. D., Hama, H., Radding, J. A., Young, D. A., and Takemoto, J. Y. (2000) Syringomycin E inhibition of *Saccharomyces cerevisiae*: Requirement for biosynthesis of sphingolipids with very-long-chain fatty acids and mannose- and phosphoinositol-containing head groups, *Antimicro. Agents & Chemo.* *44*, 1174-1180.
2. Luesch, H., Yoshida, W. Y., Moore, R. E., and Paul, V. J. (2000) Isolation and structure of the cytotoxin lyngbyabellin B and absolute configuration of lyngbyapeptin A from the marine cyanobacterium *Lyngbya majuscula*, *J. Nat. Prod.* *63*, 1437-1439.
3. Walters, M. J., Srikannathasan, V., McEwan, A. R., Naismith, J. H., Fierke, C. A., and Toone, E. J. (2008) Characterization and crystal structure of *Escherichia coli* KDPGal aldolase, *Bioorg. Med. Chem.* *16*, 710-720.
4. Choi, K. H., Shi, J., Hopkins, C. E., Tolan, D. R., and Allen, K. N. (2001) Snapshots of catalysis: the structure of fructose-1,6-(bis)phosphate aldolase covalently bound to the substrate dihydroxyacetone phosphate, *Biochemistry* *40*, 13868-13875.
5. Schurmann, M., and Sprenger, G. A. (2001) Fructose-6-phosphate aldolase is a novel class I aldolase from *Escherichia coli* and is related to a novel group of bacterial transaldolases, *J. Biol. Chem.* *276*, 11055-11061.
6. Hall, D. R., Bond, C. S., Leonard, G. A., Watt, C. I., Berry, A., and Hunter, W. N. (2002) Structure of tagatose-1,6-bisphosphate aldolase. Insight into chiral discrimination, mechanism, and specificity of class II aldolases, *J. Biol. Chem.* *277*, 22018-22024.
7. LowKam, C., Liotard, B., and Sygusch, J. (2010) Structure of a class I tagatose-1,6-bisphosphate aldolase: investigation into an apparent loss of stereospecificity, *J. Biol. Chem.* *285*, 21143-21152.
8. Kroemer, M., Merkel, I., and Schulz, G. E. (2003) Structure and catalytic mechanism of L-rhamnulose-1-phosphate aldolase, *Biochemistry* *42*, 10560-10568.
9. Joerger, A. C., Gosse, C., Fessner, W. D., and Schulz, G. E. (2000) Catalytic action of fuculose 1-phosphate aldolase (class II) as derived from structure-directed mutagenesis, *Biochemistry* *39*, 6033-6041.
10. Theodossis, A., Walden, H., Westwick, E. J., Connaris, H., Lamble, H. J., Hough, D. W., Danson, M. J., and Taylor, G. L. (2004) The structural basis for substrate promiscuity in 2-keto-3-deoxygluconate aldolase from the Entner-Doudoroff Pathway in *Sulfolobus solfataricus*, *J. Biol. Chem.* *279*, 43886-43892.
11. Allard, J., Grochulski, P., and Sygusch, J. (2001) Covalent intermediate trapped in 2-keto-3-deoxy-6-phosphogluconate (KDPG) aldolase structure at 1.95-angstrom resolution, *Proc. Natl. Acad. Sci. USA* *98*, 3679-3684.
12. Izard, T., Lawrence, M. C., Malby, R. L., Lilley, G. G., and Colman, P. M. (1994) The three-dimensional structure of N-acetylneuraminase from *Escherichia coli*, *Structure* *2*, 361-369.

13. Baker, P., Carere, J., and Seah, S. Y. (2011) Probing the molecular basis of substrate specificity, stereospecificity, and catalysis in the class II pyruvate aldolase, BphI, *Biochemistry* 50, 3559-3569.
14. Wang, W., and Seah, S. Y. (2005) Purification and biochemical characterization of a pyruvate-specific class II aldolase, HpaI, *Biochemistry* 44, 9447-9455.
15. Radaev, S., Dastidar, P., Patel, M., Woodard, R. W., and Gatti, D. L. (2000) Structure and mechanism of 3-deoxy-D-manno-octulosonate 8-phosphate synthase, *J. Biol. Chem.* 275, 9476-9484.
16. Heine, A., Luz, J. G., Wong, C. H., and Wilson, I. A. (2004) Analysis of the class I aldolase binding site architecture based on the crystal structure of 2-deoxyribose-5-phosphate aldolase at 0.99 Å resolution, *J. Mol. Biol.* 343, 1019-1034.
17. Kielkopf, C. L., and Burley, S. K. (2002) X-ray structures of threonine aldolase complexes: structural basis of substrate recognition, *Biochemistry* 41, 11711-11720.
